# Supplementary material
Source: publisher figshare collection journal article supplement (https://asha.figshare.com/articles/dataset/_/8323625)
Supplement: Supplementary file 1 [file 1]

**Supplemental Material S2.** Effects of age at implantation on literacy and academic achievement with age as discrete variable: Information provided (cochlear implant [CI] users only) by authors and calculated effect sizes.

| Authors                   | N      | M (SD) age (yrs) at implant | M (SD) age (yrs) at test                           | M (SD) duration of use (yrs) | Assessment/ task                                   | M (SD) <sup>a</sup>                                                         | Statistical analyses      | Primary finding                                                                                                                   | Effect size <sup>a</sup> |
|---------------------------|--------|-----------------------------|----------------------------------------------------|------------------------------|----------------------------------------------------|-----------------------------------------------------------------------------|---------------------------|-----------------------------------------------------------------------------------------------------------------------------------|--------------------------|
| Connor & Zwolan (2004)    | 40, 51 | 3.85 (0.89),<br>8.66 (2.40) | 9.45 (1.63),<br>12.03 (2.77)                       | 5.63 (1.56),<br>3.36 (2.00)  | WRMT<br>Passage<br>Comprehension                   | 76.42 (13.50),<br>65.02 (11.28)                                             | Correlation               | Earlier implantation but not duration of use associated with better reading scores                                                | .42, -.12 <sup>b</sup>   |
| James et al. (2007)       | 9, 10  | 2.10 (0.40),<br>6.0 (0.60)  | 7.6 (1.0),<br>9.1 (1.0)                            | 4.8 (0.10),<br>3.1 (0.70)    | British Ability<br>Scale Test of<br>Word Reading   | 95.00 (12.81),<br>81.90 (9.09)                                              | <i>t</i> -test            | Earlier implantation associated with higher scores                                                                                | .52                      |
|                           |        |                             | 1 year older                                       | 1 year more                  | British Ability<br>Scale Test of<br>Word Reading   | 89.11 (12.02),<br>81.33 (8.99)                                              | <i>t</i> -test            | No difference in word reading scores                                                                                              | .35                      |
| Johnson & Goswami (2010)  | 20, 19 | 2.58 (0.48)<br>4.91 (0.96)  | 9.25 (2.44),<br>10.92 (2.38)                       | 6.58 (2.24),<br>6.08 (2.04)  | NARA-R<br>Reading<br>Comprehension                 | 85 (15.4),<br>81 (11.4)                                                     | <i>t</i> -test            | No differences in NARA-R standard scores, but significant difference in quotient scores                                           | .15, .35                 |
| DesJardin et al. (2009)   | 8, 8   | 1.73 (1.92),<br>2.57 (0.43) | <u>At first test</u><br>4.05 (0.88)<br>4.78 (1.38) | 5.28 (0.89)                  | WJ-III DRB<br>(Basic Reading<br>Score)             | 103.00 (16.08),<br>89.75 (17.77)                                            | <i>t</i> -test            | Neither age at implantation or duration of use associated with performance                                                        | .15                      |
| Venail et al. (2010)      | 74     | 3.68 (0.06) <sup>c</sup>    | 13.7 (0.30) <sup>c</sup>                           | 10.6 (0.04) <sup>c</sup>     | Parent and<br>child telephone<br>interviews        | 53% school<br>failures                                                      | Logistic<br>regression    | No association between age at implantation and grade failure                                                                      | NR                       |
| López-Higes et al. (2015) | 19, 19 | 1.22 (0.47),<br>3.49 (1.08) | 9.69 (1.13),<br>9.88 (1.17)                        | NR                           | ECCO-PRIMA<br>Sentence<br>Comprehension            | 15.37 (1.97),<br>12.63 (3.25)<br>14.31 (2.26),<br>11.95 (3.08) <sup>3</sup> | Mann–<br>Whitney <i>U</i> | Differences on 2 of 4 sentence types: canonical word order and One proposition (vs. non-canonical word order and two proposition) | .40, .35<br>(.27, .27)   |
|                           |        |                             |                                                    |                              | Morphological<br>Awareness:<br>Nominals<br>Verbals | 16.05 (2.65),<br>13.95 (3.56)<br>23.79 (5.43),<br>16.11 (8.52)              | Mann–<br>Whitney <i>U</i> | Earlier implantation associated with better nominal and verb inflectional morphology                                              | .32<br>.48               |
| Gallego et al. (2016)     | 19, 19 | 1.22 (0.47),<br>3.49 (1.08) | 9.69 (1.13),<br>9.88 (1.17)                        | NR                           | Reading<br>comprehension<br>cloze task             | 19.84 (13.63),<br>13.63 (6.99)                                              | Kruskal–<br>Wallis        | Early implantation associated with better scores with overall                                                                     | .49                      |

| Authors                  | N                          | M (SD) age (yrs) at implant                                    | M (SD) age (yrs) at test                                         | M (SD) duration of use (yrs) | Assessment/ task                           | M (SD) <sup>a</sup>                                            | Statistical analyses | Primary finding                                                                                                                       | Effect size <sup>a</sup> |
|--------------------------|----------------------------|----------------------------------------------------------------|------------------------------------------------------------------|------------------------------|--------------------------------------------|----------------------------------------------------------------|----------------------|---------------------------------------------------------------------------------------------------------------------------------------|--------------------------|
|                          |                            |                                                                |                                                                  |                              |                                            |                                                                |                      | (but only two of four item types)                                                                                                     |                          |
| Colin et al. (2017)      | Young 26, 20<br>Old 25, 19 | Young 2.15 (0.39), 5.06 (1.86)<br>Old 2.37 (0.49), 5.16 (1.63) | Young 8.22 (0.74), 9.16 (0.75)<br>Old 10.18 (0.73), 11.13 (0.72) | NR                           | Reading comprehension cloze task           | Young 53.9 (31.3), 25.9 (22.1)<br>Old 65.9 (26.0), 43.2 (22.5) | Analysis of variance | Earlier implantation associated with better scores for both younger and older children, but earlier-implanted group had longer CI use | Young .47<br>Old .37     |
| Domínguez et al. (2016)  | 35,42                      | 1.68 (0.53), 5.41 (2.57)                                       | 10.95 (0.59), 10.93 (1.30)                                       | 6.78 (2.78), 6.98 (3.92)     | READ Global Reading Task                   | Reading Delay -0.050 (2.50), -1.25 (2.86)                      | Analysis of variance | Earlier- and later-implanted groups did not differ in reading delays                                                                  | .14                      |
| Harris & Terleksi (2010) | 30, 29                     | 3.0 (0.32), 7.42 (2.94)                                        | 13.5 (1.18), 13.75 (1.35)                                        | NR                           | British Ability Scale Test of Word Reading | Reading Delay -37.28 (29.71), -36.03 (34.67)                   | Analysis of variance | Earlier- and later-implanted groups did not differ in reading delays                                                                  | .19                      |
|                          |                            |                                                                |                                                                  |                              | Edinburgh Reading Test                     | Reading Delay -45.10 (29.68), -39.70 (35.89)                   | Analysis of variance | Earlier- and later-implanted groups did not differ in reading delays                                                                  | .08                      |

Note. NC = not calculable from information provided; NR = not reported; WRMT = Woodcock Reading Mastery Test; NARA-R = Neale Analysis of Reading Ability-Revised; WJ-III DRB = Woodcock-Johnson III Diagnostic Reading Battery; ECCO-Prima = Spanish sentence comprehension task.

<sup>a</sup>Multiple Ms (SDs) listed correspond to the order of assessments/tasks; multiple effect sizes listed correspond to the order of primary findings.

<sup>b</sup>Insufficient information to calculate the effect size for duration of implant use, but correlation coefficient provided.

<sup>c</sup>Means for significant differences only.

## References

- Colin, S., Ecalle, J., Truy, E., Lina-Granade, G., & Magnan, A. (2017). Effect of age at cochlear implantation and at exposure to cued speech on literacy skills in deaf children. *Research in Developmental Disabilities, 71*, 61–69. <https://doi.org/10.1016/j.ridd.2017.09.014>
- Connor, C., & Zwolan, T. A. (2004). Examining multiple sources of influence on the reading comprehension skills of children who use cochlear implants. *Journal of Speech, Language, and Hearing Research, 47*, 509–526. [https://doi.org/10.1044/1092-4388\(2004/040\)](https://doi.org/10.1044/1092-4388(2004/040))
- DesJardin, J. L., Ambrose, S. E., & Eisenberg, L. S. (2009). Literacy skills in children with cochlear implants: The importance of early oral language and joint storybook reading. *Journal of Deaf Studies and Deaf Education, 14*, 22–43. <https://doi.org/10.1093/deafed/enn011>
- Domínguez, A.-B., Carrillo, M.-S., González, V., & Alegria, J. (2016). How do deaf children with and without cochlear implants manage to read sentences: The key word strategy. *Journal of Deaf Studies and Deaf Education, 21*(2016), 280–292. <https://doi.org/10.1093/deafed/enw026>
- Gallego, C., Martín-Aragoneses, M. T., López-Higes, R., & Pisón, G. (2016). Semantic and syntactic reading comprehension strategies used by deaf children with early and late cochlear implantation. *Developmental Disabilities, 49*, 153–170. <https://doi.org/10.1016/j.ridd.2015.11.020>
- Harris, M., & Terleksi, E. (2010). Reading and spelling abilities of deaf adolescents with cochlear implants and hearing aids. *Journal of Deaf Studies and Deaf Education, 16*, 24–34. <https://doi.org/10.1093/deafed/enq031>

Supplemental material, Marschark et al., “Effects of Age at Cochlear Implantation on Learning and Cognition: A Critical Assessment,” *AJSLP*, [https://doi.org/10.1044/2019\\_AJSLP-18-0160](https://doi.org/10.1044/2019_AJSLP-18-0160)

- James, D., Rajput, K., Brinton, J., & Goswami, U. (2007). Phonological awareness, vocabulary, and word reading in children who use cochlear implants: Does age of implantation explain individual variability in performance outcomes and growth? *Journal of Deaf Studies and Deaf Education*, *13*(1), 117–137. <https://doi.org/10.1093/deafed/enm042>
- Johnson, C., & Goswami, U. (2010). Phonological awareness, vocabulary, and reading in deaf children with cochlear implants. *Journal of Speech, Language, and Hearing Research*, *53*, 237–261. [https://doi.org/10.1044/1092-4388\(2009/08-0139\)](https://doi.org/10.1044/1092-4388(2009/08-0139))
- López-Higes, R., Gallego, C., Martín-Aragoneses, M. T., & Melle, N. (2015). Morpho-syntactic reading comprehension in children with early and late cochlear implants. *Journal of Deaf Studies and Deaf Education*, *20*, 136–146. <https://doi.org/10.1093/deafed/env004>
- Venail, F., Vieu, A., Artieres, F., Mondain, M., & Uziel, A. (2010). Educational and employment achievements in prelingually deaf children who receive cochlear implants. *Archives of Otolaryngology—Head & Neck Surgery*, *136*, 366–372. <https://doi.org/10.1001/archoto.2010.91>
