# Supplementary material
Source: publisher figshare collection journal article supplement (https://asha.figshare.com/articles/dataset/_/8323625)
Supplement: Supplementary file 2 [file 1]

| Authors              | N  | M (SD) age (yrs) at implant | M (SD) age (yrs) at test            | M (SD) duration of use (yrs) | Assessment/task                                                            | M (SD) <sup>a</sup>                               | Statistical analyses                | Primary finding                                                                                                      | r <sup>a</sup>       |
|----------------------|----|-----------------------------|-------------------------------------|------------------------------|----------------------------------------------------------------------------|---------------------------------------------------|-------------------------------------|----------------------------------------------------------------------------------------------------------------------|----------------------|
| Ching et al. (2014)  | 62 | NR                          | “soon after turning 5 years of age” | NR                           | WJ-III DRB:<br>Letter name knowledge<br>Word Identification<br>Word Attack | 13.3 (15)<br>103.4 (103.5),<br>115.5 (110.5)      | Multiple regression                 | Earlier implantation associated only with Word Identification                                                        | NR                   |
| Sarant et al. (2015) | 44 | 1.51 (0.72)                 | 8.72 (0.24)                         | NR                           | WIAT-II:<br>Mathematics<br>Reading<br>Writing                              | 85.52 (16.72),<br>91.70 (17.25),<br>96.66 (16.48) | Correlation,<br>Multiple regression | Earlier implantation associated only with higher reading scores; difference eliminated when other factors controlled | -.09<br>-.31<br>-.07 |

Note. NR = not reported; PIAT = Peabody Individual Achievement Test–Revised; WRMT = Woodcock Reading Mastery Test; TORC = Test of Reading Comprehension; WJ-III DRB = Woodcock-Johnson III Diagnostic Reading Battery; WIAT-II = Wechsler Individual Achievement Test–Second Edition.  
<sup>a</sup>Multiple Ms (SDs) listed correspond to the order of assessments/tasks; multiple correlation coefficients listed correspond to the order of primary findings.

## References

- Archbold, S., Harris, M., O’Donoghue, G., Nikolopoulos, T., White, A., & Richmond, H. L. (2008). Reading abilities after cochlear implantation: The effect of age at implantation on outcomes at 5 and 7 years after implantation. *International Journal of Pediatric Otorhinolaryngology*, 72(10), 1471–1478. <https://doi.org/10.1016/j.ijporl.2008.06.016>
- Ching, T. Y., Day, J., & Cupples, L. (2014). Phonological awareness and early reading skills in children with cochlear implants. *Cochlear Implants International*, 15(Suppl. 1), S27–S29. <https://doi.org/10.1179/1467010014Z.000000000172>
- Geers, A. E. (2003). Predictors of reading skill development in children with early cochlear implantation. *Ear and Hearing*, 24, 59S–68S. <https://doi.org/10.1097/01.AUD.0000051690.43989.5D>
- Geers, A. E. (2004). Speech, language, and reading skills after early cochlear implantation. *Archives of Otolaryngology—Head & Neck Surgery*, 130(5), 634–638. <https://doi.org/10.1001/archotol.130.5.634>
- Geers, A. E., & Hayes, H. (2011). Reading, writing, and phonological processing skills of adolescents with 10 or more years of cochlear implant experience. *Ear and Hearing*, 32, 49S–59S. <https://doi.org/10.1097/AUD.0b013e3181fa41fa>
- Geers, A. E., Tobey, E., Moog, J., & Brenner, C. (2008). Long-term outcomes of cochlear implantation in the preschool years: From elementary grades to high school. *International Journal of Audiology*, 47(Suppl. 2), S21–S30. <https://doi.org/10.1080/14992020802339167>
- Sarant, J. Z., Harris, D. C., & Bennet, L. A. (2015). Academic outcomes for school-aged children with severe–profound hearing loss and early unilateral and bilateral cochlear implants. *Journal of Speech, Language, and Hearing Research*, 58, 1017–1032. [https://doi.org/10.1044/2015\\_JSLHR-H-14-0075](https://doi.org/10.1044/2015_JSLHR-H-14-0075)
- Uziel, A. S., Sillon, M., Vieu, A., Artieres, F., Piron, J. P., Daures, J. P., & Mondain, M. (2007). Ten-year follow-up of a consecutive series of children with multichannel cochlear implants. *Otology & Neurotology*, 28(5), 615–628. <https://doi.org/10.1097/01.mao.0000281802.59444.02>
