# Supplementary material
Source: publisher figshare collection journal article supplement (https://asha.figshare.com/articles/dataset/_/8323625)
Supplement: Supplementary file 3 [file 1]

**Supplemental Material S4.** Effects of age at implantation and cognitive functioning with age as a discrete variable: Information provided by authors for cochlear implant (CI) users and calculated effect sizes.

| Authors                 | <i>N</i>      | <i>M (SD)</i> age (yrs) at implant      | <i>M (SD)</i> Age (yrs) at Test | <i>M (SD)</i> Duration of Use (yrs) | Assessment/task                                                                                    | <i>M (SD)</i> <sup>a</sup>                                                                            | Statistical analyses | Primary finding                                                                                                                                                                                      | Effect size <sup>a</sup>    |
|-------------------------|---------------|-----------------------------------------|---------------------------------|-------------------------------------|----------------------------------------------------------------------------------------------------|-------------------------------------------------------------------------------------------------------|----------------------|------------------------------------------------------------------------------------------------------------------------------------------------------------------------------------------------------|-----------------------------|
|                         |               |                                         |                                 |                                     | Theory of mind                                                                                     |                                                                                                       |                      |                                                                                                                                                                                                      |                             |
| Most & Aviner (2009)    | 10, 10        | 3.92 (1.25),<br>11.33 (3.67)            | 13.75 (1.58),<br>15.08 (2.58)   | 9.58 (2.0),<br>3.67 (2.83)          | Identifying emotions in spoken sentences:<br>Auditory cues<br>Visual cues<br>Auditory+visual cues  | 21.63 (9.28),<br>15.97 (8.86) /<br>76.66 (10.06),<br>81.33 (8.09) /<br>74.66 (9.82),<br>79.33 (10.86) | Analysis of variance | Earlier implantation unrelated to performance in all three conditions                                                                                                                                | .30<br>.25<br>.22           |
| Sundqvist et al. (2014) | 8, 8          | 1.42 (.43),<br>3.38 (1.11)              | 6.57 (1.64),<br>7.05 (1.73)     | 5.10 (8.34),<br>3.67 (2.28)         | Sally-Anne false belief<br>Emotion recognition in stories                                          | 3.47 (3.56),<br>4.47 (2.03) /<br>1.74 (3.30),<br>2.14 (2.39)                                          | Analysis of variance | Earlier implantation associated with better performance on both tasks                                                                                                                                | .25<br>.47                  |
|                         |               |                                         |                                 |                                     | Other cognitive processes                                                                          |                                                                                                       |                      |                                                                                                                                                                                                      |                             |
| Colletti et al. (2011)  | 19,<br>21, 33 | 6.4 (2.8),<br>19.3 (3.8),<br>30.1 (5.9) | 5 -year follow-up               |                                     | Griffiths Mental Development Scale:<br>Locomotor<br>Eye-hand coordination<br>Performance subscales | 101 (12),<br>91 (13),<br>88 (8) <sup>a</sup>                                                          | NR                   | Earliest implanted group outperformed other two groups on performance scale only                                                                                                                     | .37<br>.56 <sup>a,b</sup> , |
|                         |               |                                         | 10-year follow-up               |                                     | Leiter:<br>Figure-ground<br>Form completion<br>Sequential order<br>Repeated patterns               | NR                                                                                                    | NR                   | Earliest-implanted group outperformed latest implanted group on form completion, sequential order, repeated patterns; and outperformed middle-implanted group on sequential order, repeated patterns | NC                          |
|                         |               |                                         |                                 |                                     | Historical knowledge                                                                               | 0.15 (0.15),<br>0.18 (0.14)                                                                           | <i>t</i> -test       | No difference between earlier-                                                                                                                                                                       | .14                         |

|                           |        |                              |                             |                 |                                           |                                   |                |                                                                                                       |     |
|---------------------------|--------|------------------------------|-----------------------------|-----------------|-------------------------------------------|-----------------------------------|----------------|-------------------------------------------------------------------------------------------------------|-----|
| Convertino et al. (2014)  | 25, 65 | 2.56 (0.75),<br>10.45 (5.76) | College age                 | 13.10<br>(5.25) | Famous people at                          | 0.39 (0.15),<br>0.40 (0.20)       | <i>t</i> -test | implanted in later-<br>implanted groups<br>but consistent trends<br>favoring those<br>implanted later | .03 |
|                           |        |                              |                             |                 | Geographical knowledge                    | 0.74 (0.26),<br>0.72 (0.24)       | <i>t</i> -test |                                                                                                       | .04 |
|                           |        |                              |                             |                 | Magnitude knowledge<br>± 10%              | 0.07 (0.06),<br>0.09 (0.08)       | <i>t</i> -test |                                                                                                       | .13 |
|                           |        |                              |                             |                 | Magnitude estimation ±<br>10%             | 0.09 (0.07),<br>0.09 (0.08)       | <i>t</i> -test |                                                                                                       | .00 |
| López-Higes et al. (2015) | 19, 19 | 1.22 (0.47),<br>3.49 (1.08)  | 9.69 (1.13),<br>9.88 (1.17) | NR              | WISC-IV:<br>Backward digit span           | 3.74 (0.93),<br>3.26 (0.93)       | NR             | NR                                                                                                    | .25 |
|                           |        |                              |                             |                 | WISC-IV:<br>Perceptual Reasoning<br>index | 111.05 (13.93),<br>104.16 (12.22) | NR             | NR                                                                                                    | .26 |

*Note.* NC = not calculable from information provided; NR = not reported; WISC-IV = Wechsler Intelligence Scale for Children—Fourth Edition.

<sup>a</sup>Multiple *Ms* (*SDs*) listed correspond to the order of assessments/tasks; multiple effect sizes listed correspond to the order of primary findings.

<sup>b</sup>Means and effect sizes calculable for significant differences only

## References

- Colletti, L., Mandalà, M., Zoccante, L., Shannon, R. V., & Colletti, V. (2011). Infants versus older children fitted with cochlear implants: Performance over 10 years. *International Journal of Pediatric Otorhinolaryngology*, 75(4), 504–509. <https://doi.org/10.1016/j.ijporl.2011.01.005>
- Convertino, C. M., Borgna, G., Marschark, M., & Durkin, A. (2014). Word and world knowledge among deaf students with and without cochlear implants. *Journal of Deaf Studies and Deaf Education*, 19, 471–483. <https://doi.org/10.1093/deafed/enu024>
- López-Higes, R., Gallego, C., Martín-Aragoneses, M. T., & Melle, N. (2015). Morpho-syntactic reading comprehension in children with early and late cochlear implants. *Journal of Deaf Studies and Deaf Education*, 20, 136–146. <https://doi.org/10.1093/deafed/env004>
- Most, T., & Aviner, C. (2009). Auditory, visual, and auditory–visual perception of emotions by individuals with cochlear implants, hearing aids, and normal hearing. *Journal of Deaf Studies and Deaf Education*, 14, 449–464. <https://doi.org/10.1093/deafed/enp007>
- Sundqvist, A., Lyxell, B., Jönsson, R., & Heimann, M. (2014). Understanding minds: Early cochlear implantation and the development of theory of mind in children with profound hearing impairment. *International Journal of Pediatric Otorhinolaryngology*, 78, 538–544. <https://doi.org/10.1016/j.ijporl.2013.12.039>
