# Supplementary material
Source: publisher figshare collection journal article supplement (https://asha.figshare.com/articles/dataset/_/8323625)
Supplement: Supplementary file 4 [file 1]

**Supplemental Material S3.** Effects of age at implantation and cognitive functioning with age as continuous variable: Information provided by authors for cochlear implant (CI) users and correlation coefficients, if provided, as estimates of effect size.

| Authors                                      | N  | M (SD) age (yrs) at implant | M (SD) age (yrs) at test | M (SD) duration of use (yrs) | Assessment/task                                                                                                                                               | M (SD) <sup>a</sup>                                                                      | Statistical analyses         | Primary finding                                                                                                          | r <sup>a</sup> |
|----------------------------------------------|----|-----------------------------|--------------------------|------------------------------|---------------------------------------------------------------------------------------------------------------------------------------------------------------|------------------------------------------------------------------------------------------|------------------------------|--------------------------------------------------------------------------------------------------------------------------|----------------|
|                                              |    |                             |                          |                              | <b>Executive function</b>                                                                                                                                     |                                                                                          |                              |                                                                                                                          |                |
| Kronenberger, Pisoni, Henning, et al. (2013) | 53 | 2.9 (0.34)                  | 14.4 (4.1)               | 11.5 (3.2)                   | STM/WM:<br>Forward digit span<br>Backward digit span<br>Visual digit span<br>Forward spatial span<br>Backward spatial span<br>Design memory<br>Picture memory | 6.7 (2.7)<br>8.9 (2.9)<br>8.4 (3.1)<br>9.8 (2.6)<br>10.9 (2.4)<br>9.7 (2.5)<br>8.6 (2.8) | Correlation                  | Age at implantation unrelated to all 17 measures. Only one (Stroop task) significantly related to longer duration of use | NR             |
|                                              |    |                             |                          |                              | Fluency-speed:<br>Coding<br>Coding copy<br>Visual matching<br>Retrieval fluency<br>Pair cancellation                                                          | 9.0 (2.7)<br>9.8 (3.0)<br>91.9 (18.1)<br>92.1 (13.6)<br>98.6 (11.1)                      | Correlation                  |                                                                                                                          |                |
|                                              |    |                             |                          |                              | Inhibition-concentration:<br>Trail making-switching<br>Stroop<br>TOVA RT variability<br>TOVA commissions<br>TOVA omissions                                    | 9.2 (3.2)<br>48.7 (11.1)<br>85.7 (22.6)<br>83.5 (23.5)<br>76.9 (27.5)                    | Correlation                  |                                                                                                                          |                |
| Kronenberger et al. (2014)                   | 64 | 2.96 (1.63)                 | 15.0 (4.9)               | 12.1 (3.9)                   | STM/WM:<br>Forward digit span<br>Backward digit span<br>Visual digit span<br>Forward spatial span<br>Backward spatial span                                    | NR                                                                                       | Factor analysis, correlation | None of the 11 tasks significantly related to age at implantation or duration of use                                     | NR             |
|                                              |    |                             |                          |                              | Fluency-speed:<br>Coding<br>Coding copy<br>Pair cancellation                                                                                                  | NR                                                                                       | Factor analysis, correlation |                                                                                                                          |                |

| Authors                                        | <i>N</i> | <i>M (SD)</i><br>age (yrs)<br>at implant | <i>M (SD)</i> age<br>(yrs) at test | <i>M (SD)</i><br>duration of<br>use (yrs) | Assessment/task                                                                                                                                                     | <i>M (SD)</i> <sup>a</sup>                                                                                           | Statistical<br>analyses            | Primary finding                                                                                                                                                             | <i>r</i> <sup>a</sup>                                    |
|------------------------------------------------|----------|------------------------------------------|------------------------------------|-------------------------------------------|---------------------------------------------------------------------------------------------------------------------------------------------------------------------|----------------------------------------------------------------------------------------------------------------------|------------------------------------|-----------------------------------------------------------------------------------------------------------------------------------------------------------------------------|----------------------------------------------------------|
|                                                |          |                                          |                                    |                                           | Inhibition-concentration:<br>TOVA RT variability<br>TOVA commissions<br>TOVA omissions                                                                              | NR                                                                                                                   | Factor<br>analysis,<br>correlation |                                                                                                                                                                             |                                                          |
| Beer et al.<br>(2014)                          | 24       | 1.67 (.66)                               | 4.36 (1.14)                        | 2.73 (1.14)                               | BRIEF performance:<br>attention sustained<br>memory for digits<br>visual-motor integration                                                                          | 8.95 (2.24)<br>9.96 (2.50)<br>101.54 (17.31)                                                                         | Correlation                        | None of the scales<br>significantly related<br>to age at<br>implantation, fewer<br>planning/<br>organization<br>problems related to<br>longer duration of<br>use            | -.58 <sup>b</sup>                                        |
|                                                |          |                                          |                                    |                                           | BRIEF parent-report<br>measure:<br>inhibitory control<br>working memory<br>plan/organize                                                                            | 59.32 (13.26)<br>60.55 (12.61)<br>52.68 (12.06)                                                                      | Correlation                        |                                                                                                                                                                             |                                                          |
| Marschark,<br>Spencer et al.<br>(2015), Exp. 3 | 32       | 6.9 (5.1)                                | College age                        | NR                                        | LEAF:<br>comprehension<br>factual memory<br>attention<br>processing speed<br>vis-spatial organization<br>sequential processing<br>working memory<br>problem-solving | 4.22 (2.61)<br>4.16 (2.57)<br>4.34 (2.80)<br>4.66 (2.84)<br>2.91 (2.45)<br>3.53 (2.16)<br>4.92 (3.02)<br>4.09 (2.66) | Correlation                        | None of the scales<br>significantly related<br>to age at<br>implantation                                                                                                    | -.06<br>.04<br>-.16<br>.09<br>.01<br>-.05<br>-.10<br>.16 |
|                                                |          |                                          |                                    |                                           | <b>Theory of mind (ToM)</b>                                                                                                                                         |                                                                                                                      |                                    |                                                                                                                                                                             |                                                          |
| Rommel and<br>Peters (2009)                    | 30       | 2.9 (1.4)                                | 7.5 (2.2)                          | 4.5 (1.9)                                 | 5-item ToM scale<br>Hiding-finding<br>False photograph<br>Complement memory                                                                                         | 3.84 (0.70)<br>72.25%<br>93.5%<br>93.5%                                                                              | Correlation                        | Age at implantation<br>unrelated to<br>performance in all<br>tasks, longer<br>duration of use<br>significantly related<br>to better<br>performance on 5-<br>item ToM scale, | .03<br>.14<br>.07<br>-.23                                |

| Authors                                 | <i>N</i> | <i>M (SD)</i><br>age (yrs)<br>at implant | <i>M (SD)</i> age<br>(yrs) at test | <i>M (SD)</i><br>duration of<br>use (yrs) | Assessment/task                                                                  | <i>M (SD)</i> <sup>a</sup>                  | Statistical<br>analyses | Primary finding                                                                                                                                     | <i>r</i> <sup>a</sup>         |
|-----------------------------------------|----------|------------------------------------------|------------------------------------|-------------------------------------------|----------------------------------------------------------------------------------|---------------------------------------------|-------------------------|-----------------------------------------------------------------------------------------------------------------------------------------------------|-------------------------------|
|                                         |          |                                          |                                    |                                           |                                                                                  |                                             |                         | explanation of<br>action task                                                                                                                       |                               |
| Ketelaar et al.<br>(2012)               | 72       | 0.5–3.25                                 | 3.12 (1.12)                        | 1.59 (1.06)                               | Understanding desires:<br>Common (same)<br>Uncommon (different)                  | 0.31 (0.42)<br>0.20 (0.36)                  | Correlation             | Age at implantation<br>and duration of use<br>unrelated to<br>performance                                                                           | .15, .28<br>.04, .22          |
| Marschark et<br>al. (2019)              | 46       | 6.62 (4.84)                              | College-age                        | NR                                        | Sarcasm<br>Second-order false belief<br>Double bluff                             | 0.61 (0.32)<br>0.35 (0.33)<br>0.59 (0.35)   | Multiple<br>regression  | Age at implantation<br>and duration of use<br>unrelated to<br>performance on all<br>tasks                                                           | NR                            |
|                                         |          |                                          |                                    |                                           | <b>Other cognitive<br/>processes</b>                                             |                                             |                         |                                                                                                                                                     |                               |
| Willstedt-<br>Svensson et<br>al. (2004) | 15       | 4.03 (.09)                               | 7.68 (.11)                         | 4.09 (.11)                                | Novel word learning<br>Novel word retention<br>Working memory                    | 0.46 (0.30)<br>0.28 (0.23)<br>0.41 (0.30)   | Correlation             | Later implantation<br>associated with<br>better novel word<br>learning and<br>retention, age at<br>implantation not<br>related to working<br>memory | .63<br>.72<br>“NS”            |
| Fagan et al.<br>(2007)                  | 26       | 2.5 (1.3)                                | 9.1 (2.5)                          | 2.3 (1.4)                                 | Hand imitation<br>Fingertip tapping<br>Manual motor seq.<br>Visuomotor precision | 10.6 (2.5)<br>10.7 (3.0)<br>NR<br>7.4 (3.4) | Correlation             | Only backward<br>digit span<br>associated with<br>earlier<br>implantation, no<br>significant<br>associations with<br>duration of implant<br>use     | –.52 <sup>b</sup>             |
|                                         |          |                                          |                                    |                                           | Visual-spatial design<br>copying task                                            | 8.0 (3.4)                                   |                         |                                                                                                                                                     |                               |
|                                         |          |                                          |                                    |                                           | Forward digit span<br>Backward digit span                                        | 6.5 (2.0)<br>5.0 (2.8)                      |                         |                                                                                                                                                     |                               |
|                                         |          |                                          |                                    |                                           | WRMT Word Attack<br>subtest                                                      | 101.0 (14.7)                                |                         |                                                                                                                                                     |                               |
| Conway et al.<br>(2011)                 | 25       | 1.77 (0.69)                              | 7.51 (0.82)                        | 3.13 (1.62)                               | Sequence learning:<br>Learning<br>Recall-grammatical<br>Recall-ungrammatical     | 76.19%<br>50.0%<br>52.5%                    | Partial<br>correlation  | Age at implantation<br>and duration of use<br>only marginally                                                                                       | –.41, .41<br>NR, NR<br>NR, NR |

| Authors                                           | <i>N</i> | <i>M (SD)</i><br>age (yrs)<br>at implant | <i>M (SD)</i> age<br>(yrs) at test | <i>M (SD)</i><br>duration of<br>use (yrs) | Assessment/task                                                                                     | <i>M (SD)</i> <sup>a</sup>                    | Statistical<br>analyses                                                      | Primary finding                                                                                   | <i>r</i> <sup>a</sup> |
|---------------------------------------------------|----------|------------------------------------------|------------------------------------|-------------------------------------------|-----------------------------------------------------------------------------------------------------|-----------------------------------------------|------------------------------------------------------------------------------|---------------------------------------------------------------------------------------------------|-----------------------|
|                                                   |          |                                          |                                    |                                           |                                                                                                     |                                               |                                                                              | related to learning scores                                                                        |                       |
| Kronenberger,<br>Pisoni, Harris,<br>et al. (2013) | 66       | 3.8 (1.7)                                | 7.6 (1.4)                          |                                           | WISC-III:<br>Forward digit span<br>Backward digit span                                              | 5.8 (2.9)<br>7.0 (2.6)                        | Repeated<br>measures<br>mixed-<br>effects<br>models on<br>recall<br>clusters | Age at implantation<br>unrelated to<br>memory spans at<br>either age                              | NR                    |
|                                                   |          |                                          | 11.4 (2.2)                         |                                           | WISC-III:<br>Forward digit span<br>Backward digit span                                              | 6.5 (2.9)<br>7.9 (3.2)                        |                                                                              |                                                                                                   | NR                    |
| Nicastri et al.<br>(2014)                         | 31       | 0.75–3.42                                | 8.58 (2.15)                        | 6.31 (1.74)                               | MEDEA Battery:<br>Verbal metaphors<br>Figured metaphors                                             | 2.7 (1.3)<br>3.3 (2.5)                        | Correlation                                                                  | Age at implantation<br>associated with<br>better performance<br>on all tasks except<br>Situations | -.49<br>-.65          |
|                                                   |          |                                          |                                    |                                           | MEDEA Battery:<br>Implicit inference<br>Situations inference                                        | 6.2 (2.9)<br>5.8 (1.8)                        | Correlation                                                                  |                                                                                                   | -.67<br>-.26          |
| Mancini et al.<br>(2015)                          | 31       | 0.75–3.42                                | 8.58 (2.15)                        | 6.31 (1.74)                               | MEDEA Battery:<br>Referential<br>communication                                                      | NR                                            | Correlation                                                                  | Neither age at<br>implantation nor<br>duration of use<br>associated with<br>performance           | -.14, -.05            |
| AuBuchon et<br>al. (2015)                         | 55       | 3.03 (1.67)                              | 15.3 (4.9)                         | 12.3 (3.9)                                | Verbal rehearsal speed                                                                              | 1.9 (0.4)                                     | Correlation                                                                  | Age at implantation<br>and duration of use<br>unrelated to<br>performance                         | .04, -.07             |
|                                                   |          |                                          |                                    |                                           | Perceptual encoding<br>speed:<br>Digit naming<br>Color naming                                       | 83.5 (18.3)<br>57.3 (12.6)                    | Correlation                                                                  | Age at implantation<br>and longer duration<br>of use associated<br>with better<br>performance     | .47<br>.45            |
| Marschark,<br>Spencer, et al.<br>(2015) Exp. 1    | 51       | 6.4 (4.8)                                | College-age                        | NR                                        | Visual-spatial ability:<br>WJ-III Pair Cancellation<br>WJ-III Spatial Relations<br>Embedded figures | 91.02 (9.52)<br>89.25 (8.06)<br>37.83 (13.18) | Correlation                                                                  | Age at implantation<br>associated only<br>with Spatial<br>Relations scores                        | -.21<br>-.41<br>-.25  |
| Marschark,<br>Spencer, et al.<br>(2015) Exp. 2    | 33       | 7.2 (5.7)                                | College-age                        | NR                                        | Corsi blocks:<br>Highest span<br>Total trials                                                       | 6.52 (1.25)<br>13.39 (3.35)                   | Correlation                                                                  | Age at implantation<br>unrelated to test<br>performance                                           | -.06<br>.02           |

| Authors                                  | N  | M (SD) age (yrs) at implant | M (SD) age (yrs) at test | M (SD) duration of use (yrs) | Assessment/task                                           | M (SD) <sup>a</sup>                                        | Statistical analyses  | Primary finding                                                                     | r <sup>a</sup>               |
|------------------------------------------|----|-----------------------------|--------------------------|------------------------------|-----------------------------------------------------------|------------------------------------------------------------|-----------------------|-------------------------------------------------------------------------------------|------------------------------|
| Marschark, Spencer, et al. (2015) Exp. 3 | 32 | 6.9 (5.1)                   | College-age              | NR                           | GAMA:<br>Matching<br>Analogy<br>Sequences<br>Construction | 9.88 (2.94)<br>11.31 (3.13)<br>11.84 (2.90)<br>9.94 (2.85) | Correlation           | Age at implantation significantly related only to Sequences scores                  | -.14<br>-.13<br>-.42<br>-.17 |
| De Hoog et al. (2016)                    | 39 | 1.75                        | 8.0                      | 6.17                         | Memory for words                                          | 3.82 (1.55)                                                | Correlation           | Age at implantation unrelated to performance on any tasks                           | -.01                         |
|                                          |    |                             |                          |                              | Memory for sentences                                      | 2.33 (1.95)                                                |                       |                                                                                     | -.04                         |
|                                          |    |                             |                          |                              | Forward digit span                                        | 5.15 (1.86)                                                |                       |                                                                                     | .01                          |
|                                          |    |                             |                          |                              | Backward digit span                                       | 2.85 (2.03)                                                |                       | .08                                                                                 |                              |
|                                          |    |                             |                          |                              | Non-word repetition test                                  | 6.57 (4.74)                                                |                       |                                                                                     | -.03                         |
| Talli et al. (2018)                      | 15 | 2.61 (0.85)                 | 6.65 (1.23)              | 4.05 (1.18)                  | Digit span task                                           | 3.93 (.80)                                                 | Kendall's Tau-b       | Neither age at implantation nor duration of use related to performance on any tasks | -.03, .26                    |
|                                          |    |                             |                          |                              | Non-word repetition task                                  | .39 (.16)                                                  | Kendall's Tau-b       |                                                                                     | -.23, .34                    |
|                                          |    |                             |                          |                              | Rapid picture naming task (accuracy)                      | 87.27 (26.89)                                              | Kendall's Tau-b       |                                                                                     | .01, -.39                    |
|                                          |    |                             |                          |                              | Raven's Progressive Matrices                              | 65.33 (22.55)                                              | Kendall's Tau-b       |                                                                                     | .17, .04                     |
| Klein et al. (2018)                      | 20 | 1.9 (0.90)                  | 9.4 (1.5)                | 3.7–10.2                     | Simon task<br>Serial reaction time task                   | NR                                                         | Growth curve analysis | Age at implantation unrelated to task performance                                   | NR                           |
| Torkildsen et al. (2018)                 | 34 | 1.47 (0.81)                 | 10.46 (1.56)             | 8.99 (.13)                   | Implicit sequence learning                                | 57.7 (11.6)                                                | Partial correlation   | Age at implantation unrelated to task performance                                   | .03                          |
| Borgna et al. (2018)                     | 33 | 6.03 (4.15)                 | 19.0 (1.20)              | NR                           | Numerical estimation                                      | 9.96 (5.34)                                                | Multiple regression   | Age at implantation unrelated to performance on any task                            | NR                           |
|                                          |    |                             |                          |                              | Real-world estimation                                     | 1.80 (1.08)                                                |                       |                                                                                     |                              |
|                                          |    |                             |                          |                              | ACT mathematics subtest                                   | 19.0 (3.74)                                                |                       |                                                                                     |                              |

*Note.* NR = not reported; STM/WM = short-term memory/working memory; TOVA = Test of Variables of Attention; RT = response time; BRIEF = Behavior Rating Inventory of Executive Function; LEAF = Learning, Executive, and Attention Functioning; WRMT = Woodcock Reading Mastery Test; WISC-III = Wechsler Intelligence Scale for Children–Third Edition; MEDEA = Italian Pragmatic Language Skills test; WJ-III DRB = Woodcock-Johnson III Diagnostic Reading Battery; GAMA = General Ability Measure for Adults.

<sup>a</sup>Multiple *M*s (*SD*s) listed correspond to the order of assessments/tasks; multiple correlation coefficients listed correspond to the order of primary findings.

<sup>b</sup>Correlation coefficients for significant effects only.

## References

- AuBuchon, A. M., Pisoni, D. B., & Kronenberger, W. G. (2015). Short-term and working memory impairments in early-implanted, long-term cochlear implant users are independent of audibility and speech production. *Ear and Hearing, 36*(6), 733–737. <https://doi.org/10.1097/AUD.000000000000189>
- Beer, J., Kronenberger, W. G., Castellanos, I., Colson, B. G., Henning, S. C., & Pisoni, D. B. (2014). Executive functioning skills in preschool-age children with cochlear implants. *Journal of Speech, Language, and Hearing Research, 57*(4), 1521–1534. [https://doi.org/10.1044/2014\\_JSLHR-H-13-0054](https://doi.org/10.1044/2014_JSLHR-H-13-0054)
- Borgna, G., Convertino, C., Walton, D., Marschark, M., Crowe, K., & Trussell, J. (2018). Numerical and real-world estimation abilities of deaf and hearing college students. *Deafness and Education International, 20*, 59–79. <https://doi.org/10.1080/14643154.2018.1437238>
- Conway, C. M., Pisoni, D. B., Anaya, E. M., Karpicke, J., & Henning, S. C. (2011). Implicit sequence learning in deaf children with cochlear implants. *Developmental Science, 14*, 69–82. <https://doi.org/10.1111/j.1467-7687.2010.00960.x>
- De Hoog, B. E., Langereis, M. C., van Weerdenburg, M., Keuning, J., Knoors, H., & Verhoeven, L. (2016). Auditory and verbal memory predictors of spoken language skills in children with cochlear implants. *Research and Developmental Disabilities, 57*, 112–124. <https://doi.org/10.1016/j.ridd.2016.06.019>
- Fagan, M. K., Pisoni, D. B., Horn, D. L., & Dillon, C. M. (2007). Neuropsychological correlates of vocabulary, reading, and working memory in deaf children with cochlear implants. *Journal of Deaf Studies and Deaf Education, 12*, 461–471. <https://doi.org/10.1093/deafed/enm023>
- Ketelaar, L., Rieffe, C., Wiefferink, C., & Frijns, J. (2012). Does hearing lead to understanding? Theory of mind in toddlers and preschoolers with cochlear implants. *Journal of Pediatric Psychology, 37*, 1041–1050. <https://doi.org/10.1093/jpepsy/jss086>
- Klein, K. E., Walker, E. A., & Tomblin, J. B. (2018). Nonverbal visual sequential learning in children with cochlear implants: Preliminary findings. *Ear and Hearing. https://doi.org/10.1097/AUD.0000000000000564*
- Kronenberger, W. G., Beer, J., Castellanos, I., Pisoni, D. B., & Miyamoto, R. T. (2014). Neurocognitive risk in children with cochlear implants. *JAMA Otolaryngology—Head & Neck Surgery, 140*, 608–615. <https://doi.org/10.1001/jamaoto.2014.757>
- Kronenberger, W. G., Pisoni, D. B., Harris, M. S., Hoen, H. M., Xu, H., & Miyamoto, R. T. (2013). Profiles of verbal working memory growth predict speech and language development in children with cochlear implants. *Journal of Speech, Language, and Hearing Research, 56*, 805–825. [https://doi.org/10.1044/1092-4388\(2012/11-0356\)](https://doi.org/10.1044/1092-4388(2012/11-0356))
- Kronenberger, W. G., Pisoni, D. B., Henning, S. C., & Colson, B. G. (2013). Executive functioning skills in long-term users of cochlear implants: A case control study. *Journal of Pediatric Psychology, 38*, 902–914. <https://doi.org/10.1093/jpepsy/jst034>
- Mancini, P., Dincer D'Alessandro, H., Guerzoni, L., Cuda, D., Ruoppolo, G., Musacchio, A., . . . Nicastrì, M. (2015). Adequate formal language performance in unilateral cochlear implanted children: Is it indicative of complete recovery in all linguistic domains? Insights from referential communication. *International Journal of Pediatric Otorhinolaryngology, 79*, 598–604. <https://doi.org/10.1016/j.ijporl.2015.02.003>
- Marschark, M., Edwards, L., Peterson, C., Crowe, K., & Walton, D. (2019). Understanding theory of mind in deaf and hearing college students. *Journal of Deaf Studies and Deaf Education, 24*, 104–118. <https://doi.org/10.1093/deafed/eny039>
- Marschark, M., Spencer, L., Durkin, A., Borgna, G., Convertino, C., Machmer, E., Kronenberger, W. G., & Trani, A. (2015). Understanding language, hearing status, and visual–spatial skills. *Journal of Deaf Studies and Deaf Education, 20*, 310–330. <https://doi.org/10.1093/deafed/env025>
- Nicastrì, M., Filipo, R., Ruoppolo, G., Viccaro, M., Dincer, H., Guerzoni, L., . . . Mancini, P. (2014). Inferences and metaphoric comprehension in unilaterally implanted children with adequate formal oral language performance. *International Journal of Pediatric Otorhinolaryngology, 78*(5), 821–827. <https://doi.org/10.1016/j.ijporl.2014.02.022>
- Rommel, E., & Peters, K. (2009). Theory of mind and language in children with cochlear implants. *Journal of Deaf Studies and Deaf Education, 14*, 218–236. <https://doi.org/10.1093/deafed/enn036>
- Talli, I., Okalidou, A., & Tsalighopoulos, M. (2018). The relation between short-term memory and vocabulary skills in Greek children with cochlear implants: The role of hearing experience. *First Language, 38*, 359–381. <https://doi.org/10.1177/0142723717749073>

Supplemental material, Marschark et al., "Effects of Age at Cochlear Implantation on Learning and Cognition: A Critical Assessment," *AJSLP*, [https://doi.org/10.1044/2019\\_AJSLP-18-0160](https://doi.org/10.1044/2019_AJSLP-18-0160)

Torkildsen, J. V. K., Arciuli, J., Haukedal, C. L., & Wie, O. B. (2018). Does a lack of auditory experience affect sequential learning? *Cognition*, *170*, 123–129.

<https://doi.org/10.1016/j.cognition.2017.09.017>

Willstedt-Svensson, U., Löfqvist, A., Almqvist, B., & Sahlén, B. (2004). Is age at implant the only factor that counts? The influence of working memory on lexical and grammatical development in children with cochlear implants. *International Journal of Audiology*, *43*, 506–515.

<https://doi.org/10.1080/14992020400050065>
